# Supplementary material for: Geographic origin and evolutionary history of China’s two predominant HIV-1 circulating recombinant forms, CRF07_BC and CRF08_BC
Source: PubMed Central journal article supplement (PMC4725877; doi:10.1038/srep19279), 2016-01-14

Supplementary Materials for

**Geographic origin and evolutionary history of China's two predominant HIV-1 circulating recombinant forms, CRF07\_BC and CRF08\_BC**

Yi Feng<sup>\*</sup>, Yutaka Takebe<sup>\*</sup>, Huamian Wei, Xiang He, Jenny H. Hsi, Zhenpeng Li, Hui Xing<sup>1</sup>,

Yuhua Ruan, Yao Yang, Fan Li, Jing Wei, Xingguang Li, Yiming Shao

Corresponding author. Tel: +86 10 5890 0981; e-mail: [yshao08@gmail.com](mailto:yshao08@gmail.com) (Y.S.)

<sup>\*</sup>These authors contributed equally to this work.

**This PDF file includes:**

Supplemental Table S1

Supplemental Figure S1-S4

**Supplemental Table S1. Estimated substitution rates and tMRCAs of subtype C and its recombinant lineages in China <sup>a</sup>**

| HIV-1 subtype C<br>and<br>its recombinant<br>lineage | tMRCAs estimation [Median (95% HPD)]        |                                  |                                       |
|------------------------------------------------------|---------------------------------------------|----------------------------------|---------------------------------------|
|                                                      | Region I (Ia +Ib)                           | Region II                        | Region III                            |
|                                                      | <i>gag</i><br>(HXB2:790-1191nt;1642-2010nt) | <i>pol</i><br>(HXB2:3331-5593nt) | <i>env 1</i><br>(HXB2: 6541nt-8695nt) |
| C <sub>AF</sub>                                      | 1966.4 (1959.7, 1971.8)                     | 1968.6 (1964.5, 1972.4)          | 1965.9 (1960.8, 1969.9)               |
| C <sub>IN</sub>                                      | 1978.0 (1972.9, 1982.9)                     | 1976.2 (1972.6, 1979.4)          | 1971.8 (1968.4, 1974.9)               |
| Yunnan URFs_BC                                       | 1987.0 (1981.6, 1991.5)                     | 1988.6 (1986.4, 1990.6)          | 1986.1 (1983.8, 1988.2)               |
| CRF07_BC                                             | 1994.0 (1991.9, 1995.6)                     | 1994.1 (1992.8, 1995.4)          | 1991.6 (1989.6, 1993.3)               |
| CRF08_BC                                             | 1992.7 (1989.9, 1994.9)                     | 1992.7 (1990.5, 1994.4)          | 1990.7 (1988.7, 1992.5)               |
| CRF57_BC                                             |                                             |                                  | 1993.2 (1990.7, 1995.3)               |
| CRF61_BC                                             | 2003.6 (2000.5, 2006.0)                     | 2002.6 (2000.1, 2004.6)          | 2001.5 (1999.3, 2003.6)               |
| CRF62_BC                                             | 2003.7 (1998.8, 2007.2)                     | 2003.0 (2000.0, 2005.7)          | 2002.3 (1999.4, 2004.9)               |
| CRF64_BC                                             |                                             |                                  | 1995.4 (1993.3, 1998.0)               |

<sup>a</sup> Based on BEAST analysis under a relaxed molecular clock with GTR +  $\gamma_4$  substitution model and skyline model. Estimated substitution rates are  $3.76 \times 10^{-3}$ ,  $2.23 \times 10^{-3}$ , and  $6.36 \times 10^{-3}$  substitutions/site/year for *gag* (Region (Ia +Ib)), *pol* (II), and *env* (III) regions, respectively. ESS values are >200 for all data sets.

Supplementary Figure S1

Neighbor-joining tree constructed with MEGA 6 using the NFLG sequences

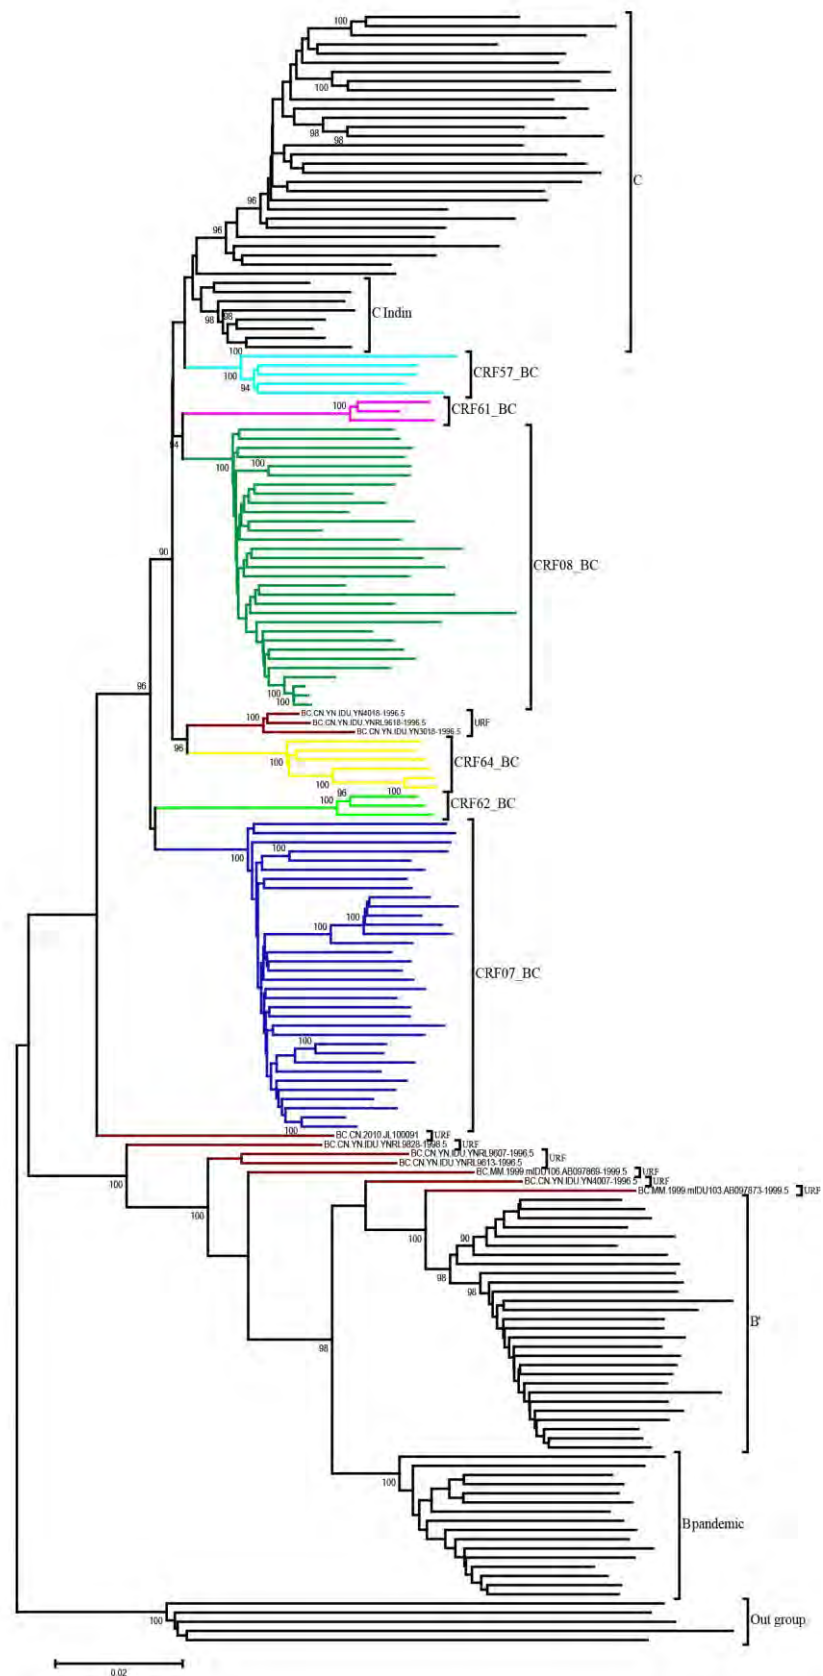

# Supplementary Figure S2

Bootscanning and similarity plot analyses performed with different window and step sizes for defining the precise subtype structure of CRFs and URFs in this study

## CRF07\_BC

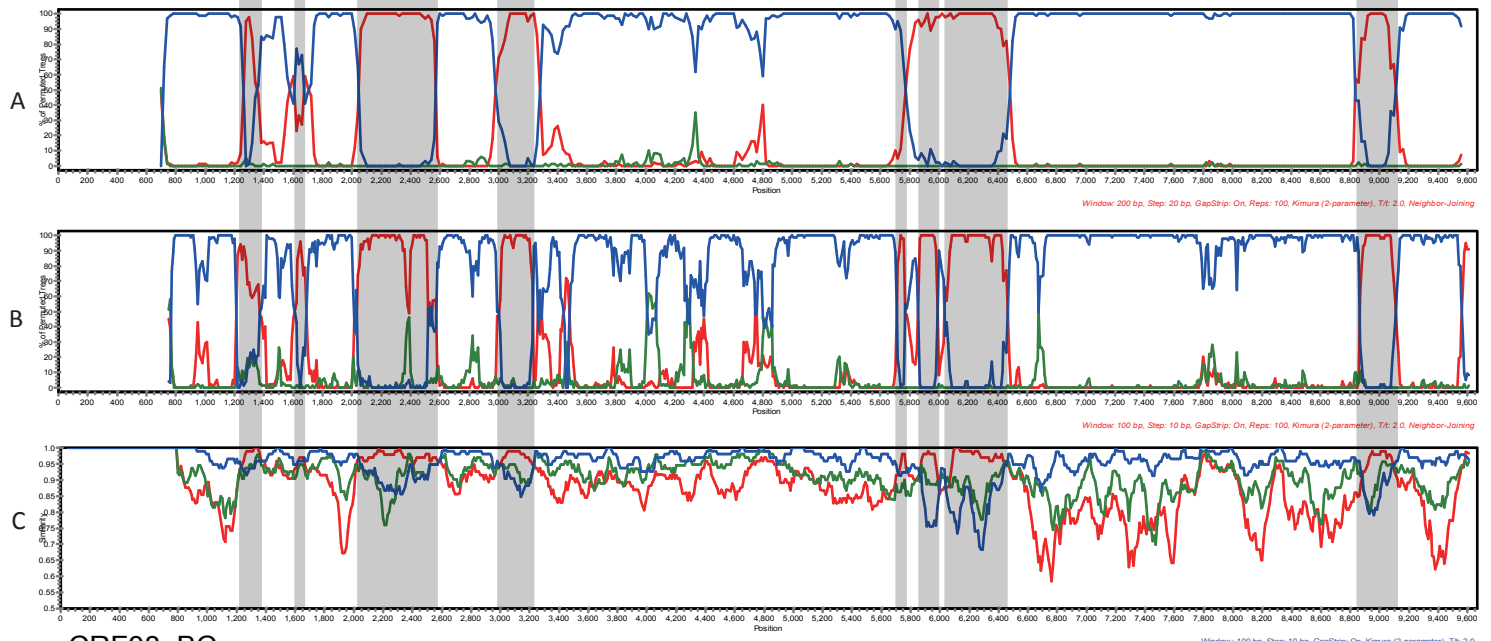

## CRF08\_BC

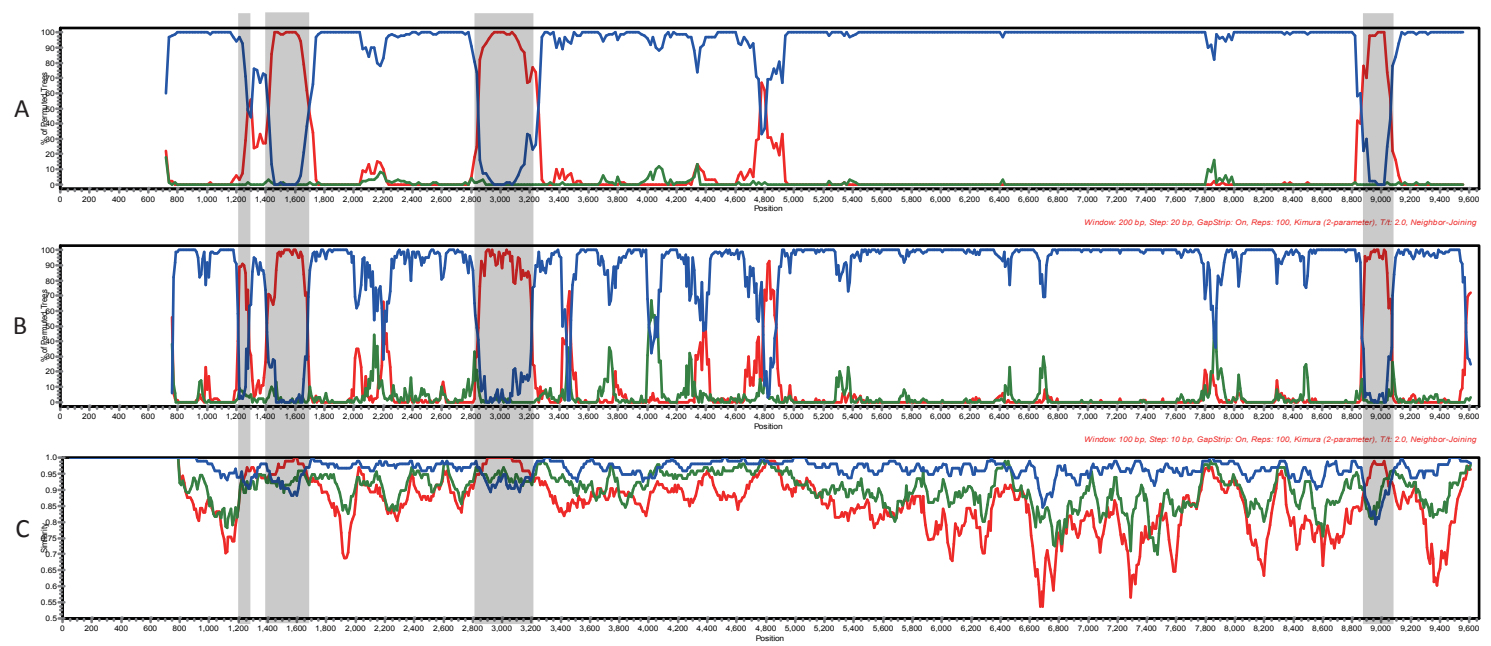

## CRF57\_BC

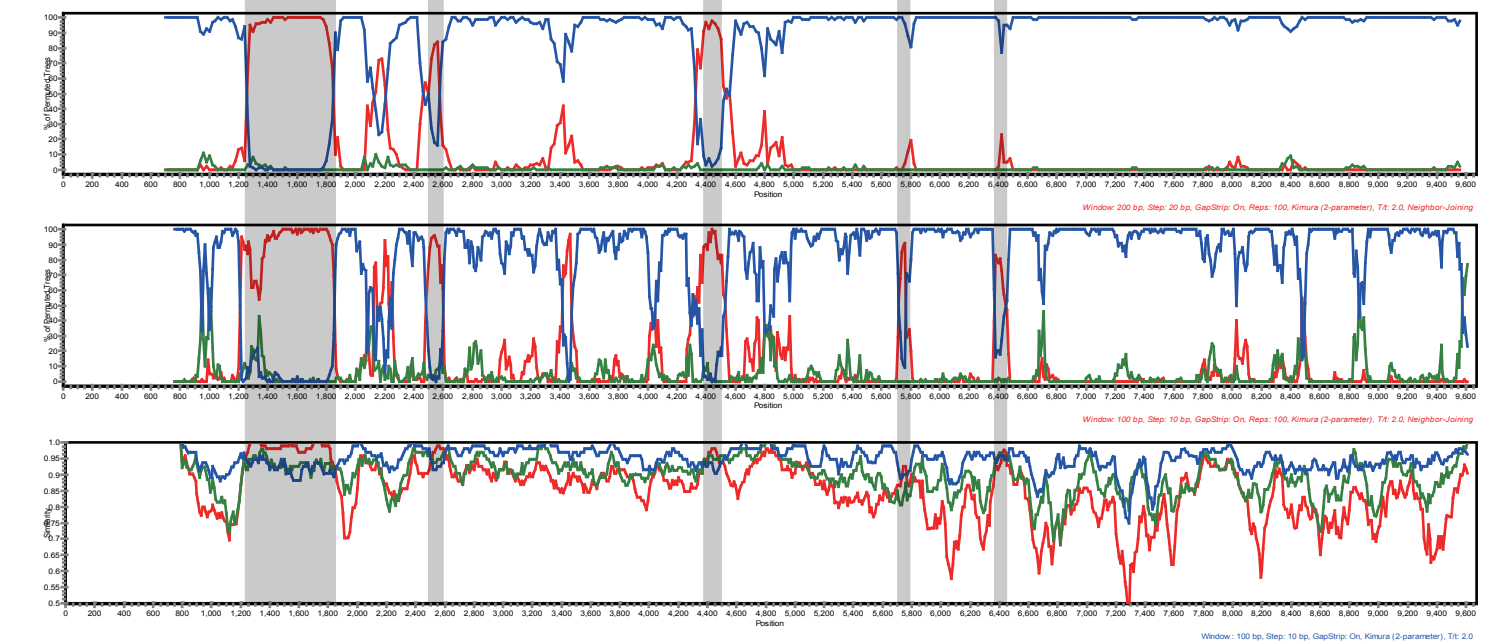



# CRF61\_BC

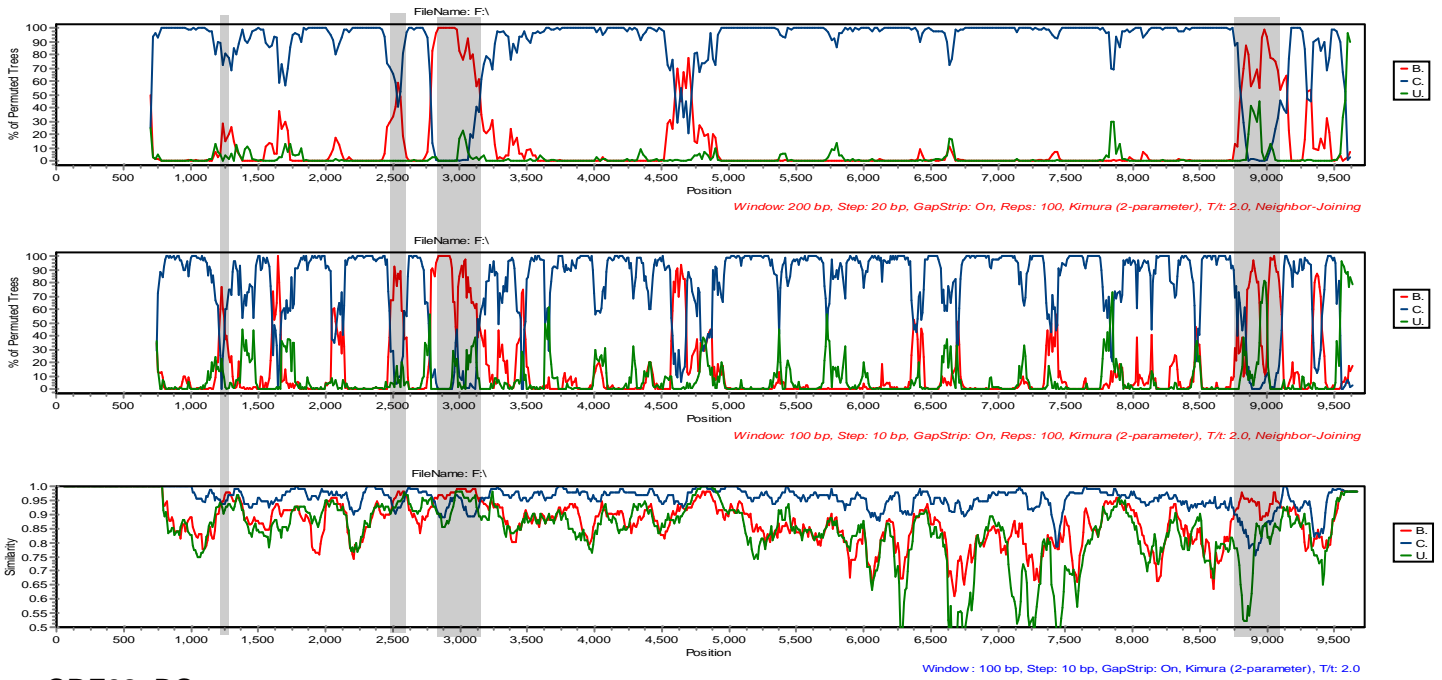

# CRF62\_BC

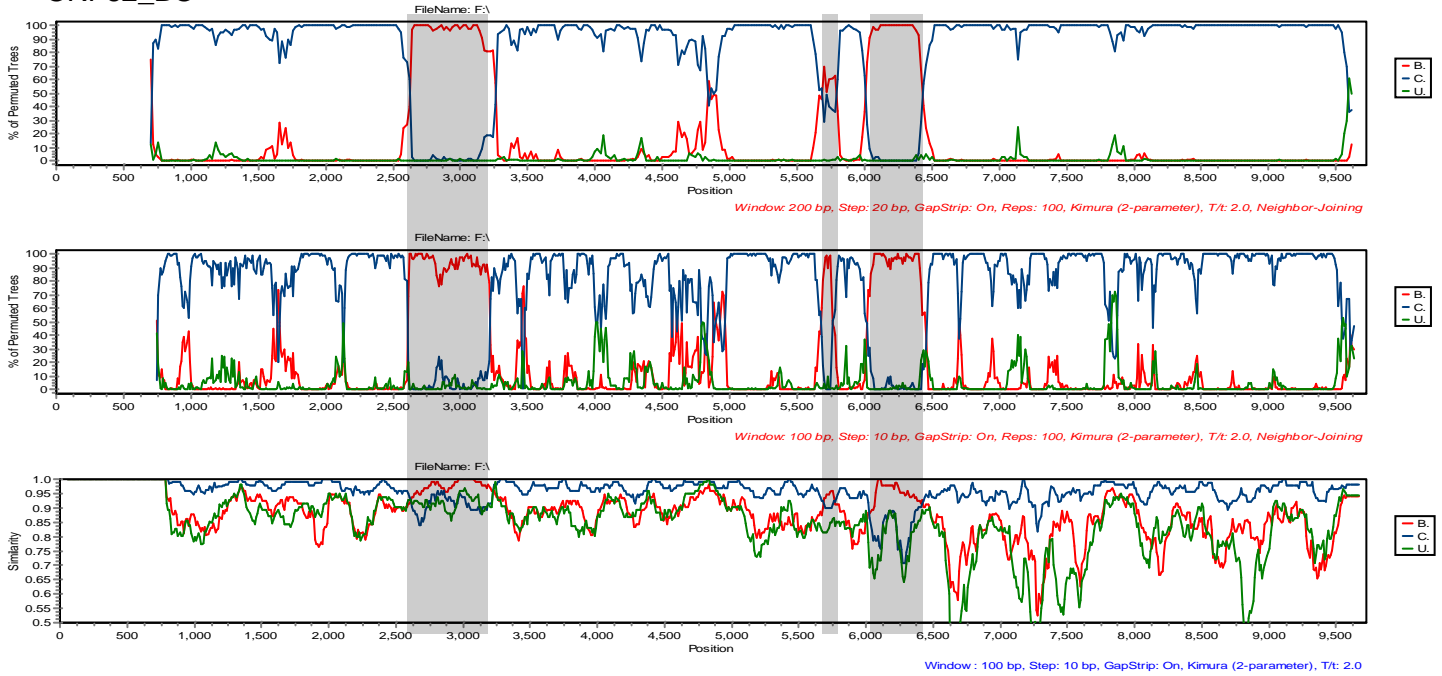

# CRF64\_BC

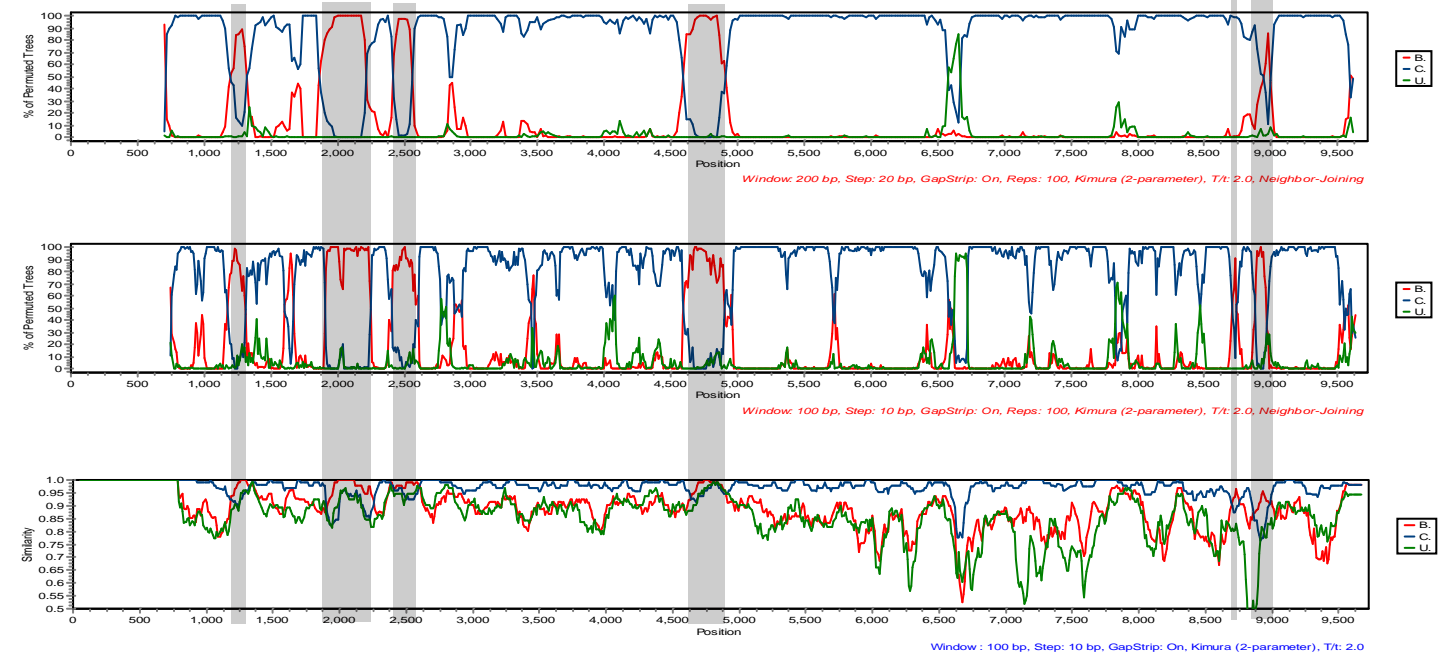

Query: YNRL9607

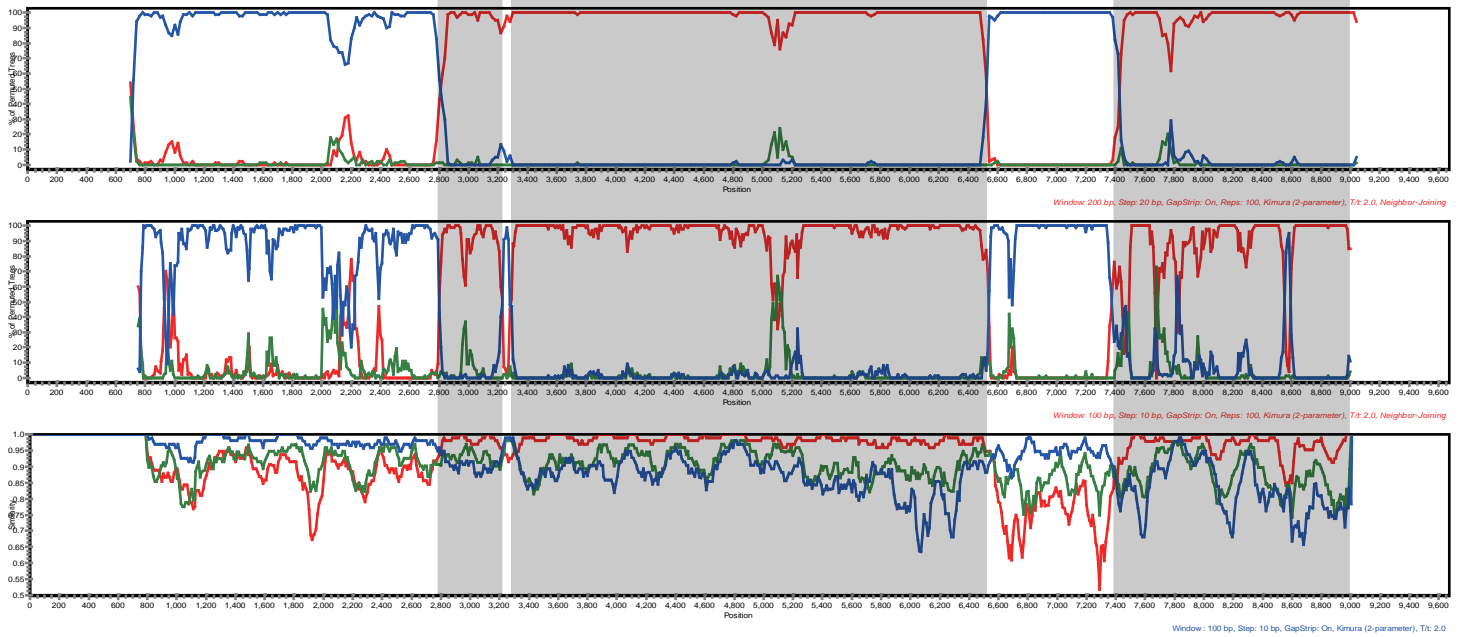

Query: YNRL9613

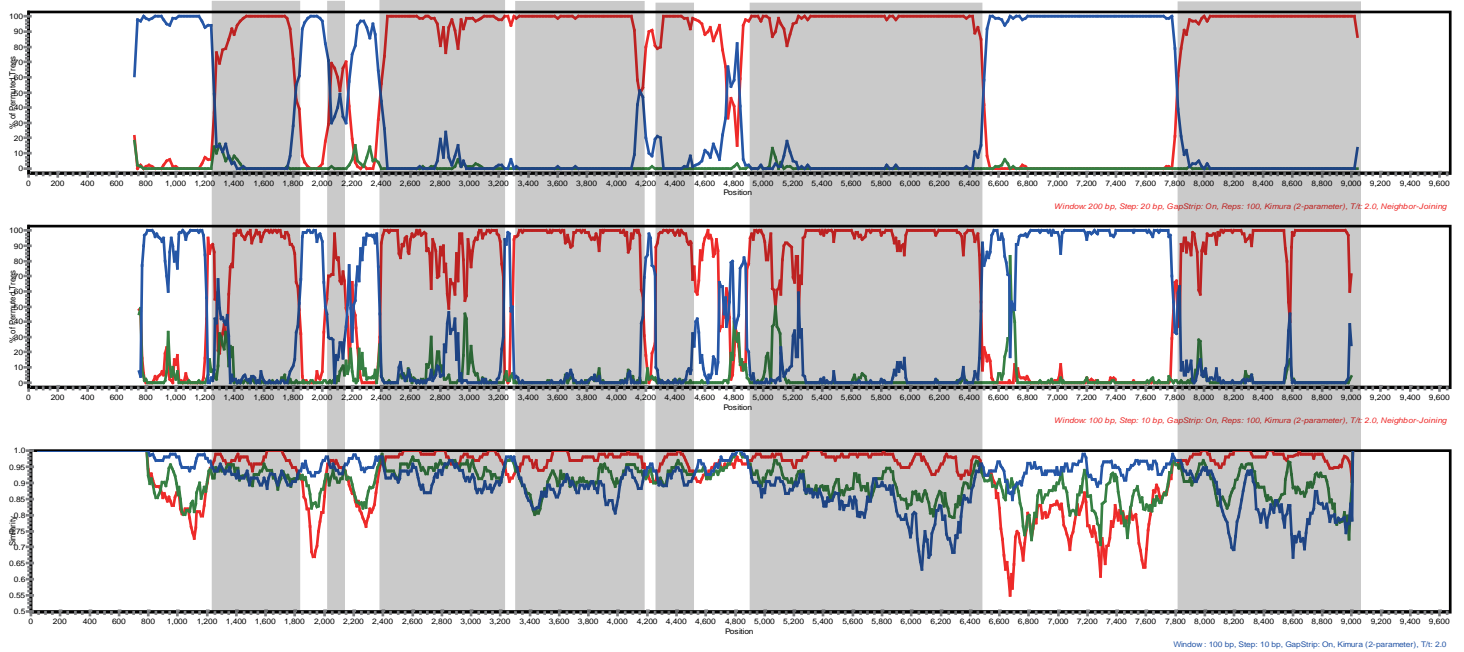

Query: YNRL9618

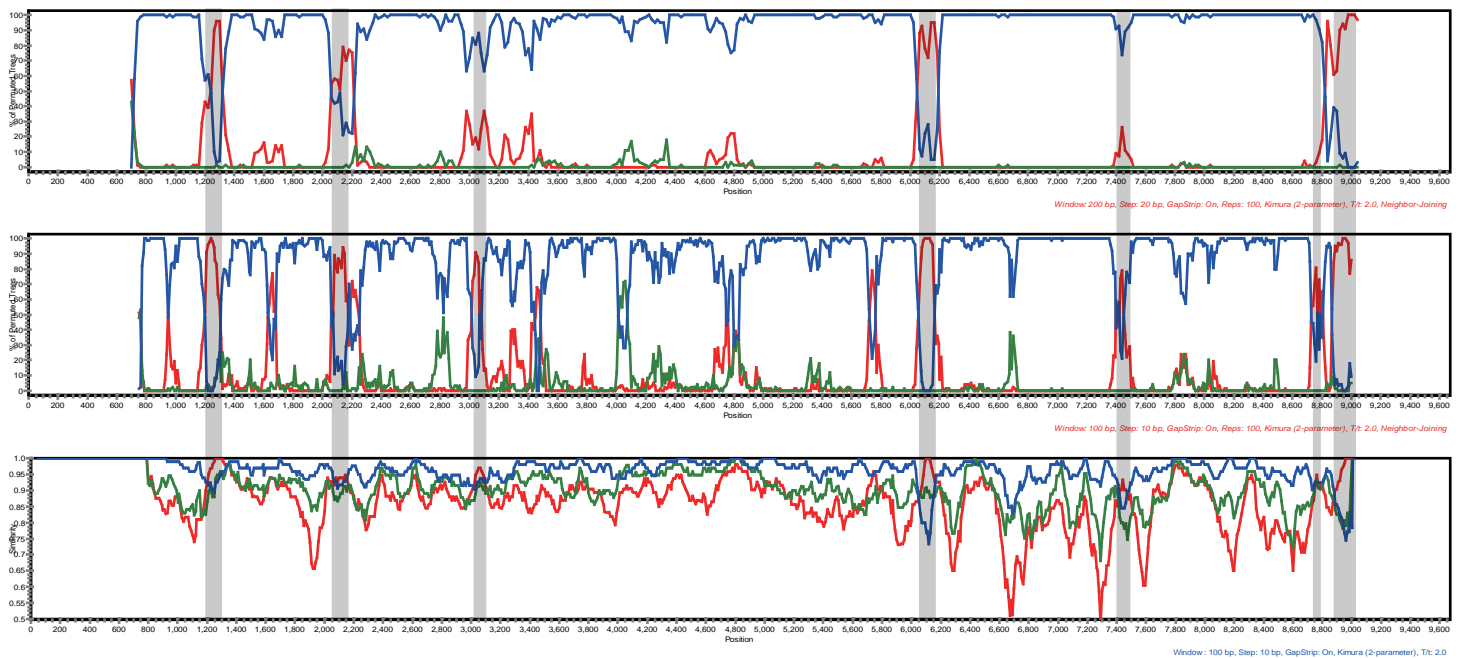

Query: YNRL9828

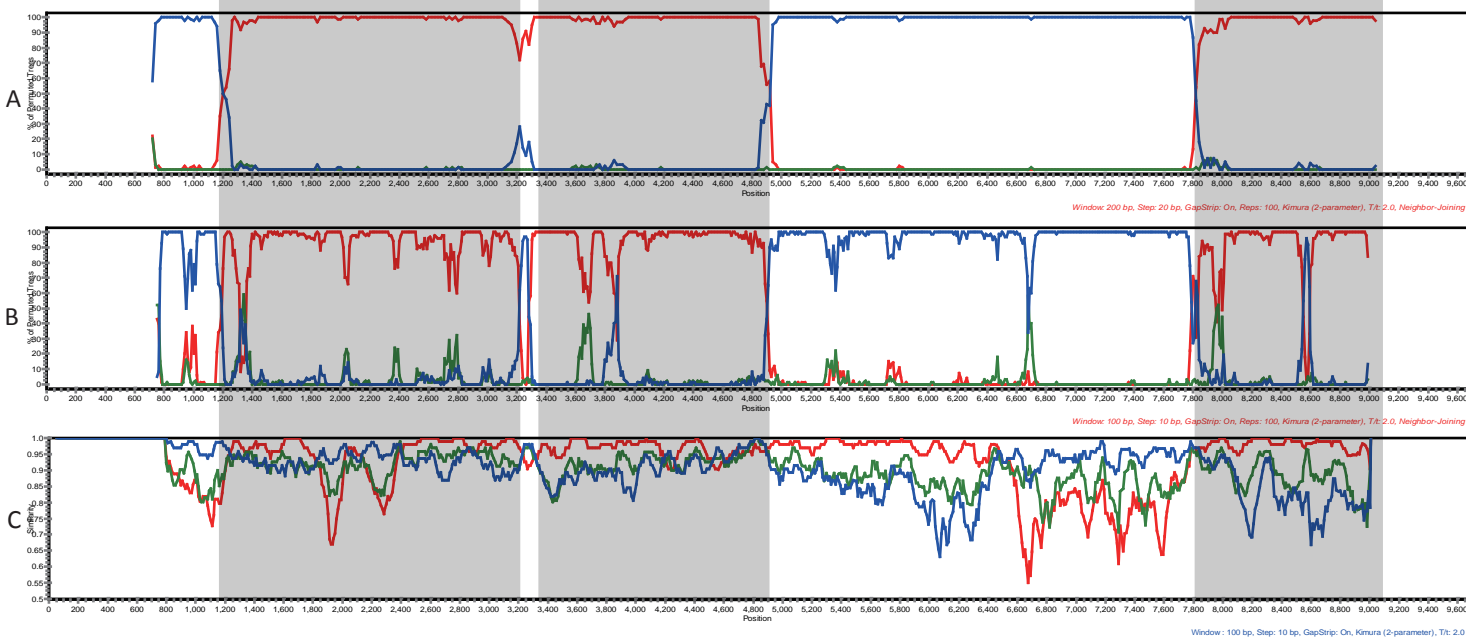

Query: YN3018

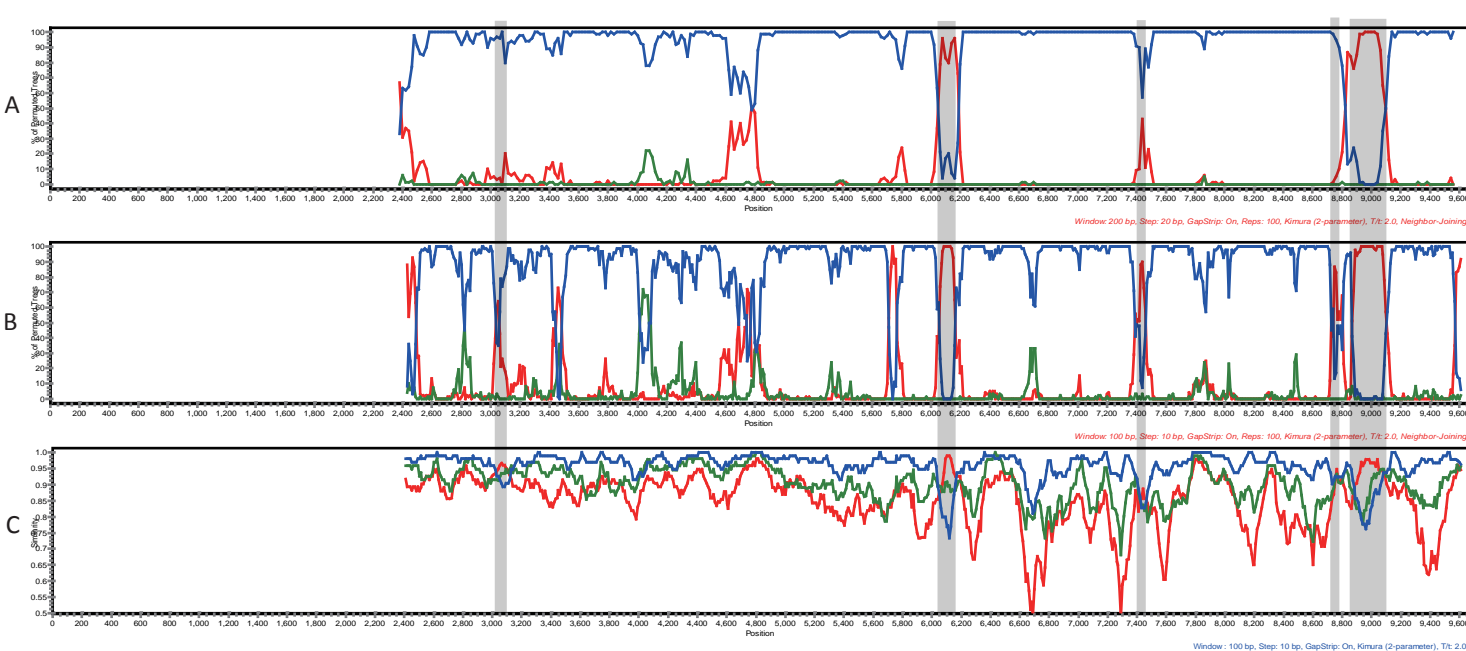

Query: YN4007

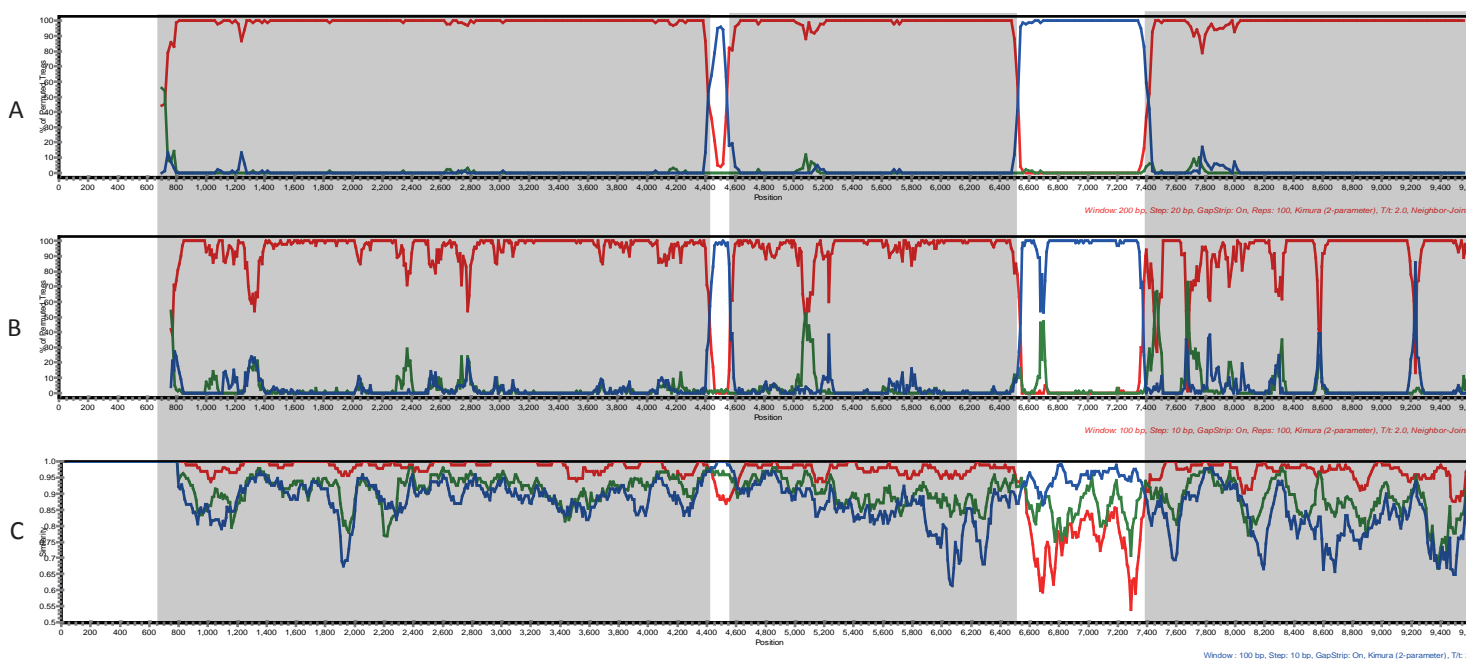

Query: YN4018

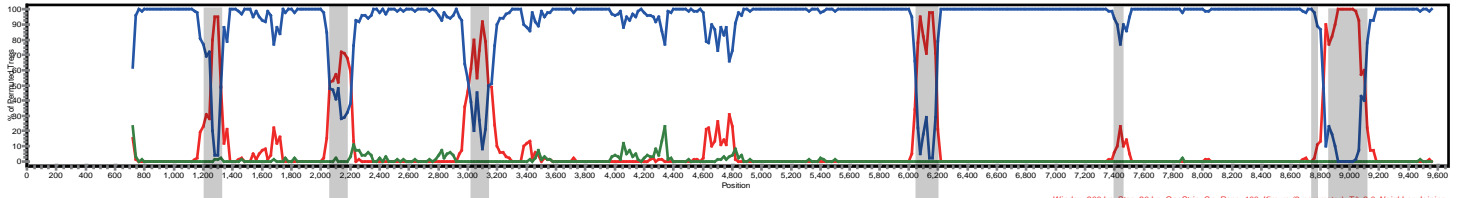

Window: 200 bp, Step: 20 bp, GapStrip: On, Reqs: 100, Kimura (2-parameter), Tt: 2.0, Neighbor-Joining

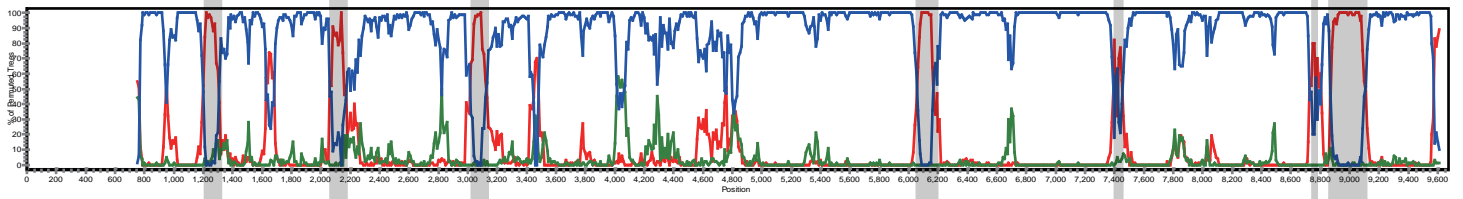

Window: 100 bp, Step: 10 bp, GapStrip: On, Reqs: 100, Kimura (2-parameter), Tt: 2.0, Neighbor-Joining

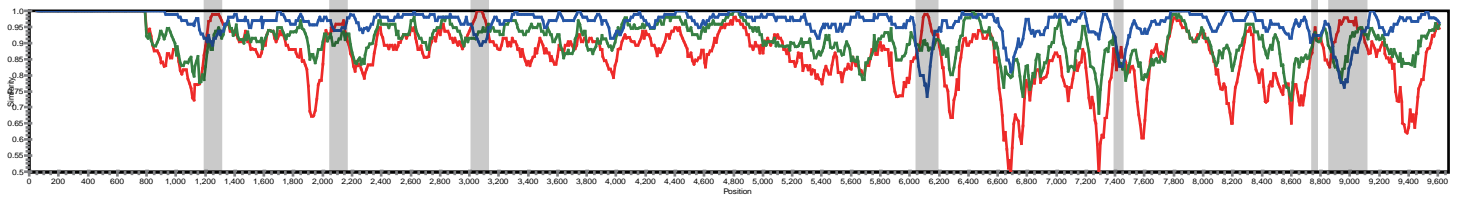

Window: 100 bp, Step: 10 bp, GapStrip: On, Kimura (2-parameter), Tt: 2.0

Query: mDU103

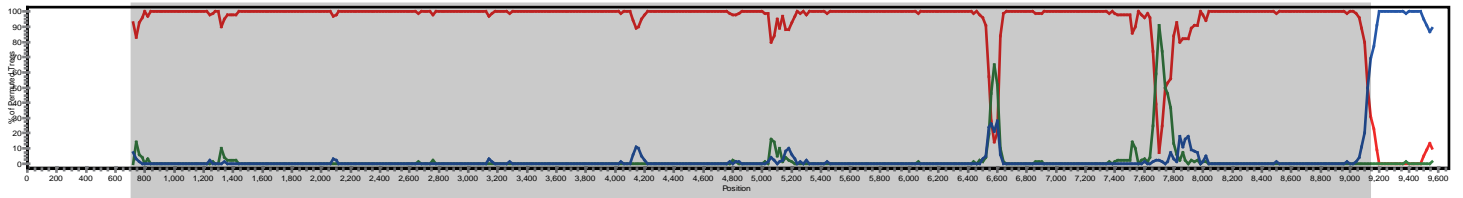

Window: 200 bp, Step: 20 bp, GapStrip: On, Reqs: 100, Kimura (2-parameter), Tt: 2.0, Neighbor-Joining

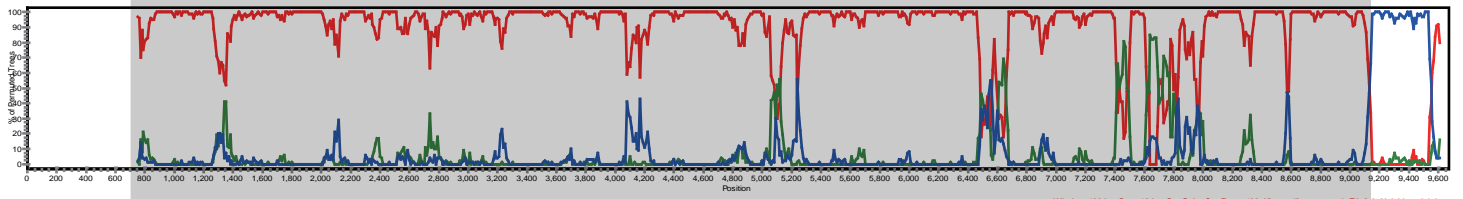

Window: 100 bp, Step: 10 bp, GapStrip: On, Reqs: 100, Kimura (2-parameter), Tt: 2.0, Neighbor-Joining

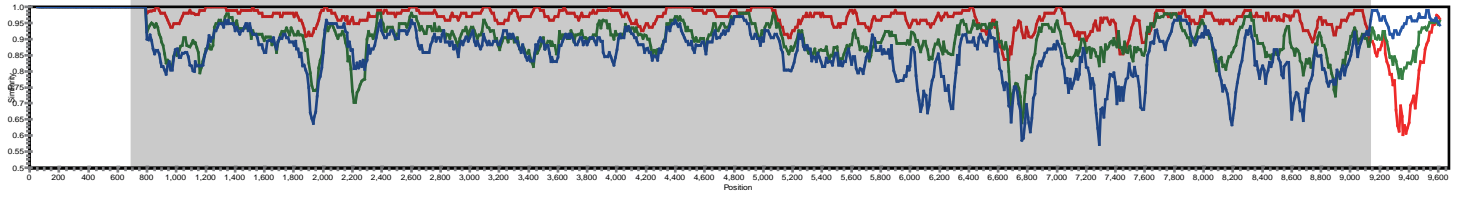

Window: 100 bp, Step: 10 bp, GapStrip: On, Kimura (2-parameter), Tt: 2.0

Query: mDU106.

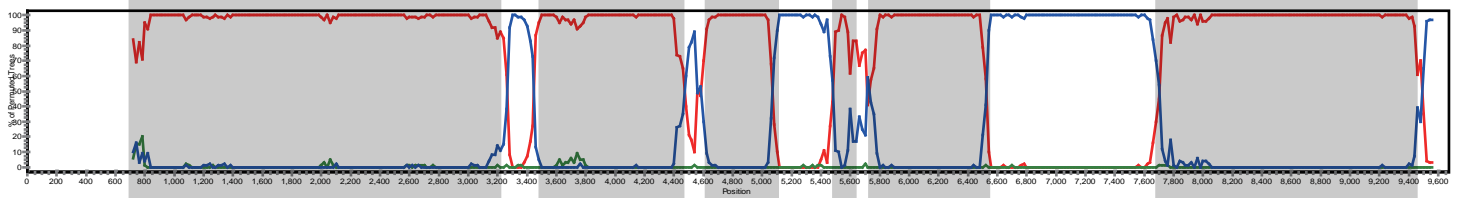

Window: 200 bp, Step: 20 bp, GapStrip: On, Reqs: 100, Kimura (2-parameter), Tt: 2.0, Neighbor-Joining

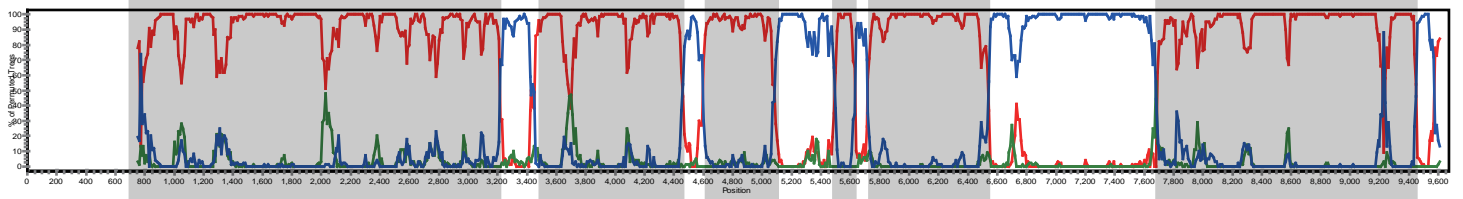

Window: 100 bp, Step: 10 bp, GapStrip: On, Reqs: 100, Kimura (2-parameter), Tt: 2.0, Neighbor-Joining

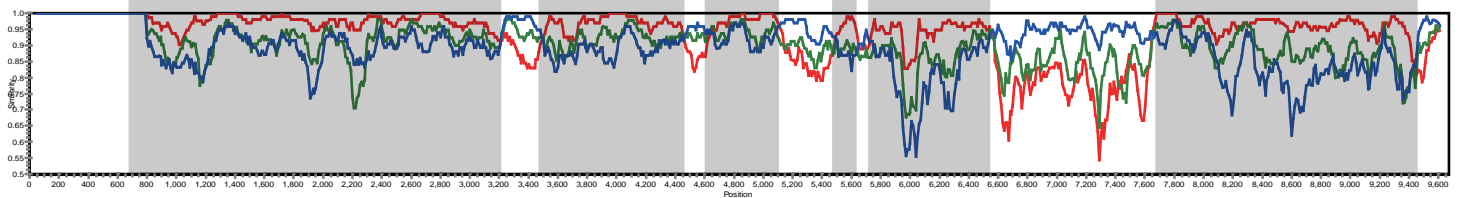

Window: 100 bp, Step: 10 bp, GapStrip: On, Kimura (2-parameter), Tt: 2.0







Site 3 (HXB2: ~3180)

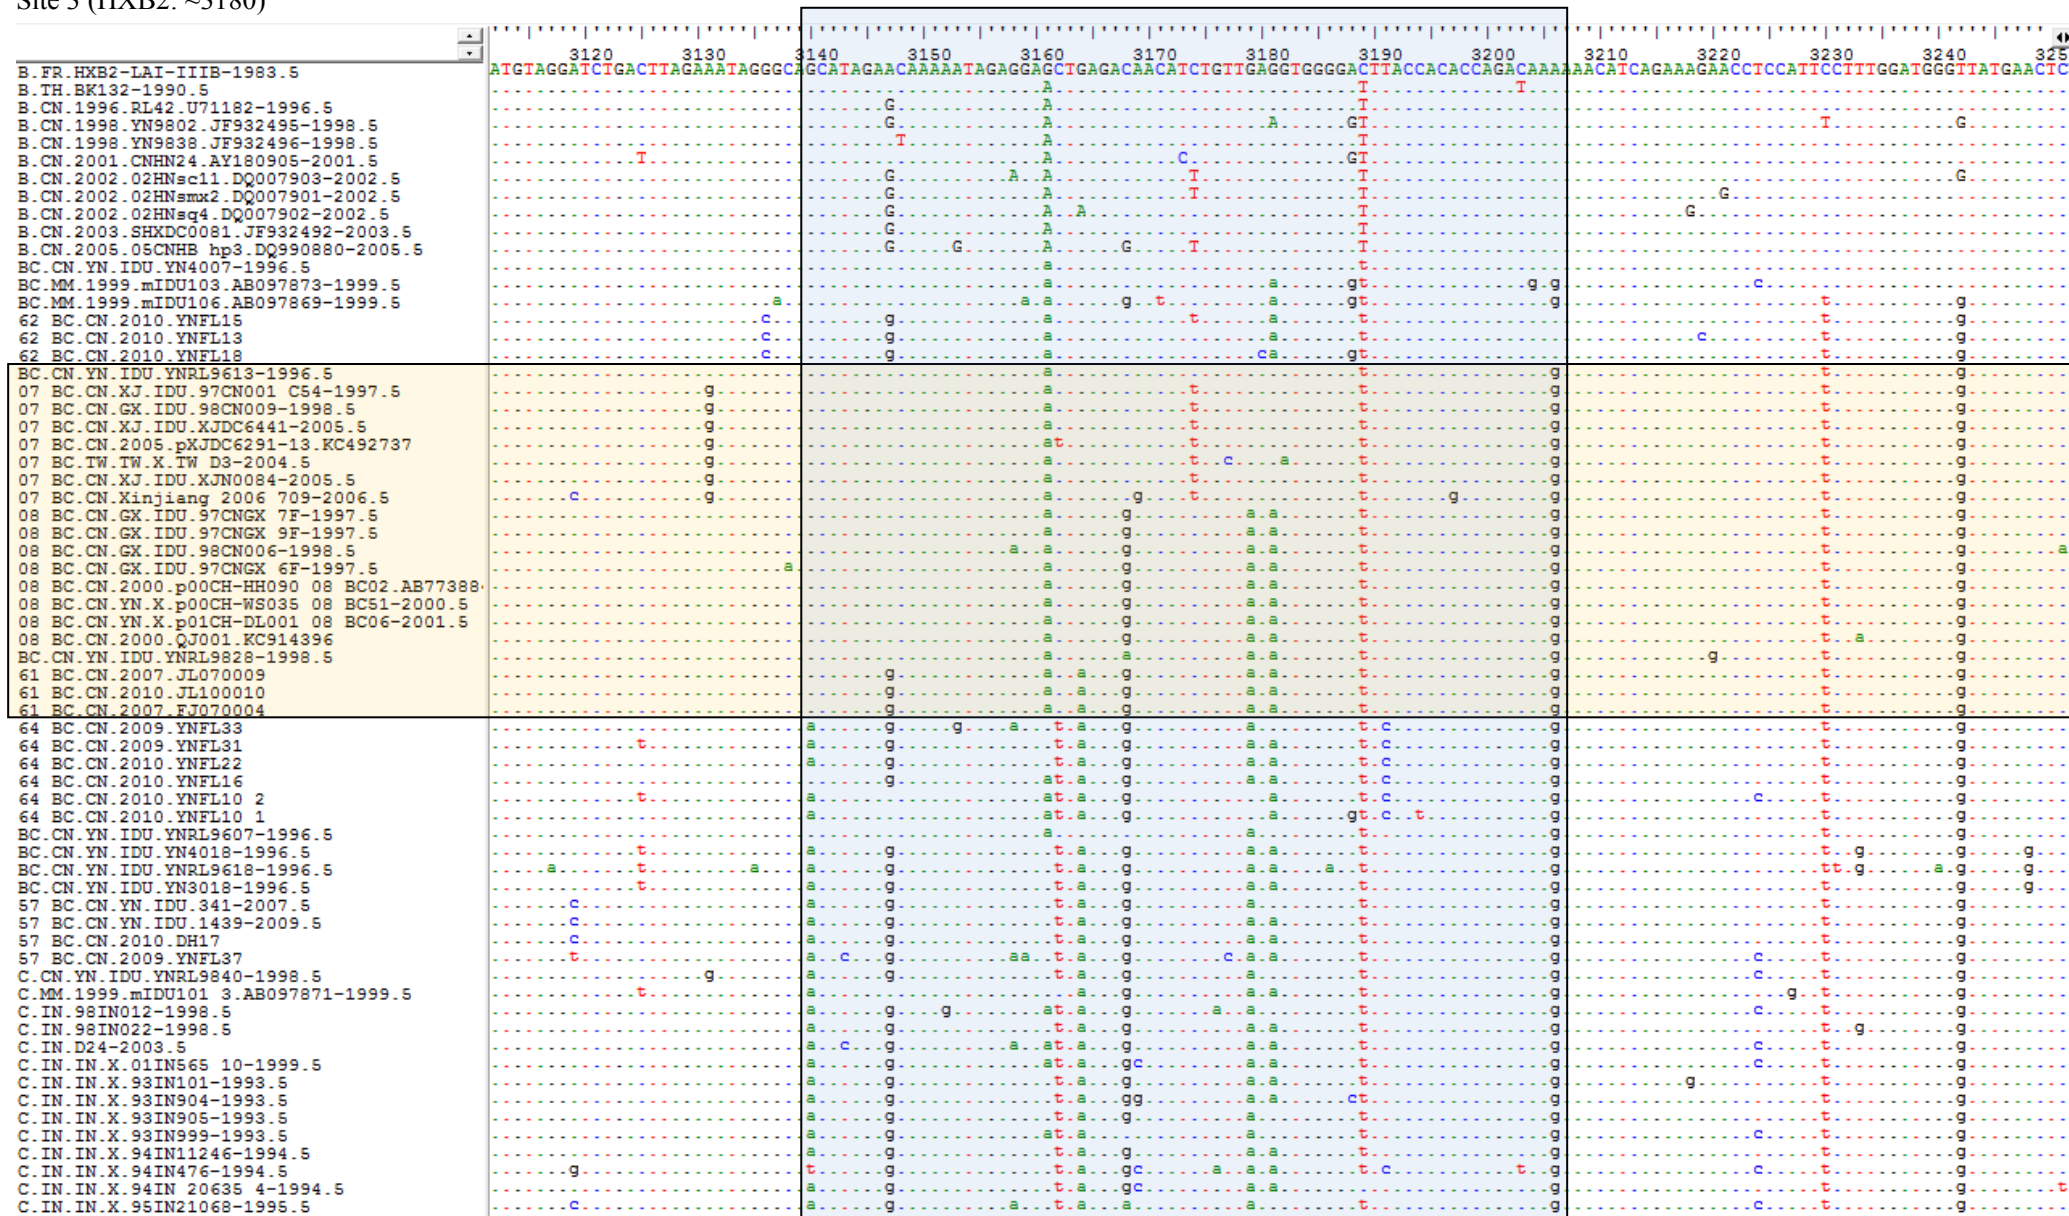



Site 4 (HXB2: ~5694)

|                                           | 5620     | 5630        | 5640           | 5650        | 5660        | 5670      | 5680        | 5690             | 5700       | 5710          | 5720       | 5730      | 5740      | 5750 |
|-------------------------------------------|----------|-------------|----------------|-------------|-------------|-----------|-------------|------------------|------------|---------------|------------|-----------|-----------|------|
| B.FR.HXB2-LAI-IIIB-1993.5                 | GAGCTTTT | TAGAGGAGCTT | AAGAAATGAAGCTG | TTAGACATTTT | CCTAGGATTGG | CTCCATGGG | CTTAGGGCAAC | ATATCTATGAAACTTA | GGGGATACTT | GGGCGAGGAGTGG | AAGCCATAAT | AAGAAATTC | TGCAACAAC | T    |
| B.TH.BK132-1990.5                         |          |             | GA             |             | C           | CA        |             | T                |            | C             |            |           |           |      |
| B.CN.1996.RL42.U71182-1996.5              |          |             | GA             |             |             | A         | A           | C                | A          |               |            |           |           | C    |
| B.CN.1998.YN9802.JF932495-1998.5          | A        |             | G              |             |             | G         | A           | C                | A          |               |            |           |           | C    |
| B.CN.1998.YN9838.JF932496-1998.5          |          |             | GA             |             |             | A         | T           | G                | G          | A             |            | T         | G         | C    |
| B.CN.2001.CNHN24.AY180905-2001.5          | G        |             | GGG            |             |             | G         |             | AG               | C          | A             |            |           | T         | C    |
| B.CN.2002.02HNsc11.DQ007903-2002.5        |          |             | GG             |             |             | A         |             | AG               | C          | A             |            |           |           |      |
| B.CN.2002.02HNsmx2.DQ007901-2002.5        |          |             | GG             |             |             | CA        |             | C                | C          | A             |            |           |           |      |
| B.CN.2002.02HNsq4.DQ007902-2002.5         |          |             | GG             |             |             | GA        |             | AG               | C          | A             |            |           |           |      |
| B.CN.2003.SHXDC0081.JF932492-2003.5       |          |             | GG             |             |             | GA        |             | AG               | C          | A             |            |           |           |      |
| B.CN.2005.05CNHB.hp3.DQ990880-2005.5      |          | A           | GG             |             |             | GA        |             | AG               | C          | A             |            |           | T         |      |
| BC.CN.YN.IDU.YN4007-1996.5                |          |             |                |             |             | g         |             | g                | a          | t             |            |           |           | c    |
| BC.CN.YN.IDU.YNRL9613-1996.5              |          |             |                |             |             | g         |             | g                | g          | a             |            |           |           | c    |
| BC.CN.YN.IDU.YNRL9607-1996.5              |          |             |                |             |             | g         |             | g                | g          | a             |            |           |           | c    |
| BC.MM.1999.mIDU103.AB097873-1999.5        |          |             |                | a           |             | g         | a           | c                | a          | g             |            |           |           | c    |
| BC.MM.1999.mIDU106.AB097869-1999.5        |          | a           |                | ga          |             | c         |             | c                |            |               |            |           |           | a    |
| BC.CN.YN.IDU.YNRL9618-1996.5              |          | c           | a              | c           | c           | g         |             | c                | a          |               |            |           |           | c    |
| BC.CN.YN.IDU.YN3018-1996.5                |          |             | c              | c           | c           | g         |             | c                | a          |               |            |           |           | c    |
| 57 BC.CN.YN.IDU.341-2007.5                |          | c           | a              | a           | c           | c         | g           |                  | c          |               |            |           |           | c    |
| 57 BC.CN.YN.IDU.1439-2009.5               |          |             | a              | c           | c           | g         |             | c                | a          |               |            |           |           | c    |
| 57 BC.CN.2010.DH17                        |          |             | a              | c           | c           | g         |             | c                | a          |               |            |           |           | c    |
| 57 BC.CN.2009.YNFL37                      |          |             | a              | c           | c           | g         |             | c                | a          |               |            |           |           | c    |
| 62 BC.CN.2010.YNFL15                      |          | g           | a              | c           | c           | g         |             | t                | a          | ca            |            |           |           | c    |
| 62 BC.CN.2010.YNFL13                      |          | g           | a              | c           | c           | g         |             | t                | a          | ca            |            |           |           | c    |
| 62 BC.CN.2010.YNFL18                      |          | g           | a              | c           | c           | g         |             | t                | a          | ca            |            |           |           | c    |
| 07 BC.CN.KJ.IDU.97CN001.C54-1997.5        |          |             | c              | c           | c           | g         |             | c                | a          |               |            |           |           | c    |
| 07 BC.CN.GX.IDU.98CN009-1998.5            |          |             | c              | c           | c           | g         |             | c                | a          |               |            |           |           | c    |
| 07 BC.CN.KJ.IDU.XJDC6441-2005.5           |          |             | c              | c           | c           | g         |             | c                | a          |               |            |           |           | c    |
| 07 BC.CN.2005.pXJDC6291-13.KC492737       |          |             | c              | c           | c           | g         |             | c                | a          |               |            |           |           | c    |
| 07 BC.TW.TW.X.TW.D3-2004.5                |          | a           |                | c           | c           | g         |             | c                | a          |               |            |           |           | c    |
| 07 BC.CN.KJ.IDU.XJN0084-2005.5            |          |             | c              | c           | c           | g         |             | c                | a          |               |            |           |           | c    |
| 07 BC.CN.Xinjiang.2006.709-2006.5         |          |             | c              | c           | c           | g         |             | c                | a          |               |            |           |           | c    |
| 08 BC.CN.GX.IDU.97CNGX.7F-1997.5          |          |             | a              | c           | c           | g         |             | t                | a          |               |            |           |           | c    |
| 08 BC.CN.GX.IDU.97CNGX.9F-1997.5          |          |             | a              | c           | c           | g         |             | t                | a          |               |            |           |           | c    |
| 08 BC.CN.GX.IDU.98CN006-1998.5            |          |             | a              | c           | c           | g         |             | t                | a          |               |            |           |           | c    |
| 08 BC.CN.GX.IDU.97CNGX.6F-1997.5          |          |             | a              | c           | c           | g         |             | t                | a          |               |            |           |           | c    |
| 08 BC.CN.2000.p00CH-HH090.08.BC02.AB77388 |          |             | a              | c           | c           | g         |             | t                | a          |               |            |           |           | c    |
| 08 BC.CN.YN.X.p00CH-WS035.08.BC51-2000.5  |          |             | a              | c           | c           | g         |             | t                | a          |               |            |           |           | c    |
| 08 BC.CN.YN.X.p01CH-DL001.08.BC06-2001.5  |          |             | a              | c           | c           | g         |             | t                | a          |               |            |           |           | c    |
| 08 BC.CN.2000.QJ001.KC914396              |          |             | a              | c           | c           | g         |             | t                | a          |               |            |           |           | c    |
| BC.CN.YN.IDU.YNRL9828-1998.5              |          |             | a              | c           | c           | g         |             | t                | a          |               |            |           |           | c    |
| 61 BC.CN.2007.JL070009                    |          |             | a              | c           | c           | g         |             | t                | a          |               |            |           |           | c    |
| 61 BC.CN.2010.JL100010                    |          |             | a              | c           | c           | g         |             | t                | a          |               |            |           |           | c    |
| 61 BC.CN.2007.FJ070004                    |          |             | a              | c           | c           | g         |             | t                | a          |               |            |           |           | c    |
| 64 BC.CN.2009.YNFL33                      |          |             | a              | c           | c           | g         |             | t                | a          |               |            |           |           | c    |
| 64 BC.CN.2009.YNFL31                      |          |             | a              | c           | c           | g         |             | t                | a          |               |            |           |           | c    |
| 64 BC.CN.2010.YNFL22                      |          |             | a              | c           | c           | g         |             | t                | a          |               |            |           |           | c    |
| 64 BC.CN.2010.YNFL16                      |          |             | a              | c           | c           | g         |             | t                | a          |               |            |           |           | c    |
| 64 BC.CN.2010.YNFL10.2                    |          |             | a              | c           | c           | g         |             | t                | a          |               |            |           |           | c    |
| 64 BC.CN.2010.YNFL10.1                    |          |             | a              | c           | c           | g         |             | t                | a          |               |            |           |           | c    |
| BC.CN.YN.IDU.YN4018-1996.5                |          |             | a              | c           | c           | g         |             | t                | a          |               |            |           |           | c    |
| C.CN.YN.IDU.YNRL9840-1998.5               |          |             | a              | c           | c           | g         |             | t                | a          |               |            |           |           | c    |
| C.MM.1999.mIDU101.3.AB097871-1999.5       |          |             | a              | c           | c           | g         |             | t                | a          |               |            |           |           | c    |
| C.IN.98IN012-1998.5                       |          |             | a              | c           | c           | g         |             | t                | a          |               |            |           |           | c    |
| C.IN.98IN022-1998.5                       |          |             | a              | c           | c           | g         |             | t                | a          |               |            |           |           | c    |
| C.IN.D24-2003.5                           |          |             | a              | c           | c           | g         |             | t                | a          |               |            |           |           | c    |
| C.IN.IN.X.01IN565.10-1999.5               |          |             | a              | c           | c           | g         |             | t                | a          |               |            |           |           | c    |
| C.IN.IN.X.93IN101-1993.5                  |          |             | a              | c           | c           | g         |             | t                | a          |               |            |           |           | c    |
| C.IN.IN.X.93IN904-1993.5                  |          |             | a              | c           | c           | g         |             | t                | a          |               |            |           |           | c    |
| C.IN.IN.X.93IN905-1993.5                  |          |             | a              | c           | c           | g         |             | t                | a          |               |            |           |           | c    |
| C.IN.IN.X.93IN999-1993.5                  |          |             | a              | c           | c           | g         |             | t                | a          |               |            |           |           | c    |
| C.IN.IN.X.94IN11246-1994.5                |          |             | a              | c           | c           | g         |             | t                | a          |               |            |           |           | c    |
| C.IN.IN.X.94IN476-1994.5                  |          |             | a              | c           | c           | g         |             | t                | a          |               |            |           |           | c    |
| C.IN.IN.X.94IN.20635.4-1994.5             |          |             | a              | c           | c           | g         |             | t                | a          |               |            |           |           | c    |
| C.IN.IN.X.95IN21068-1995.5                |          |             | a              | c           | c           | g         |             | t                | a          |               |            |           |           | c    |











Site 8 (HXB2: ~9059)

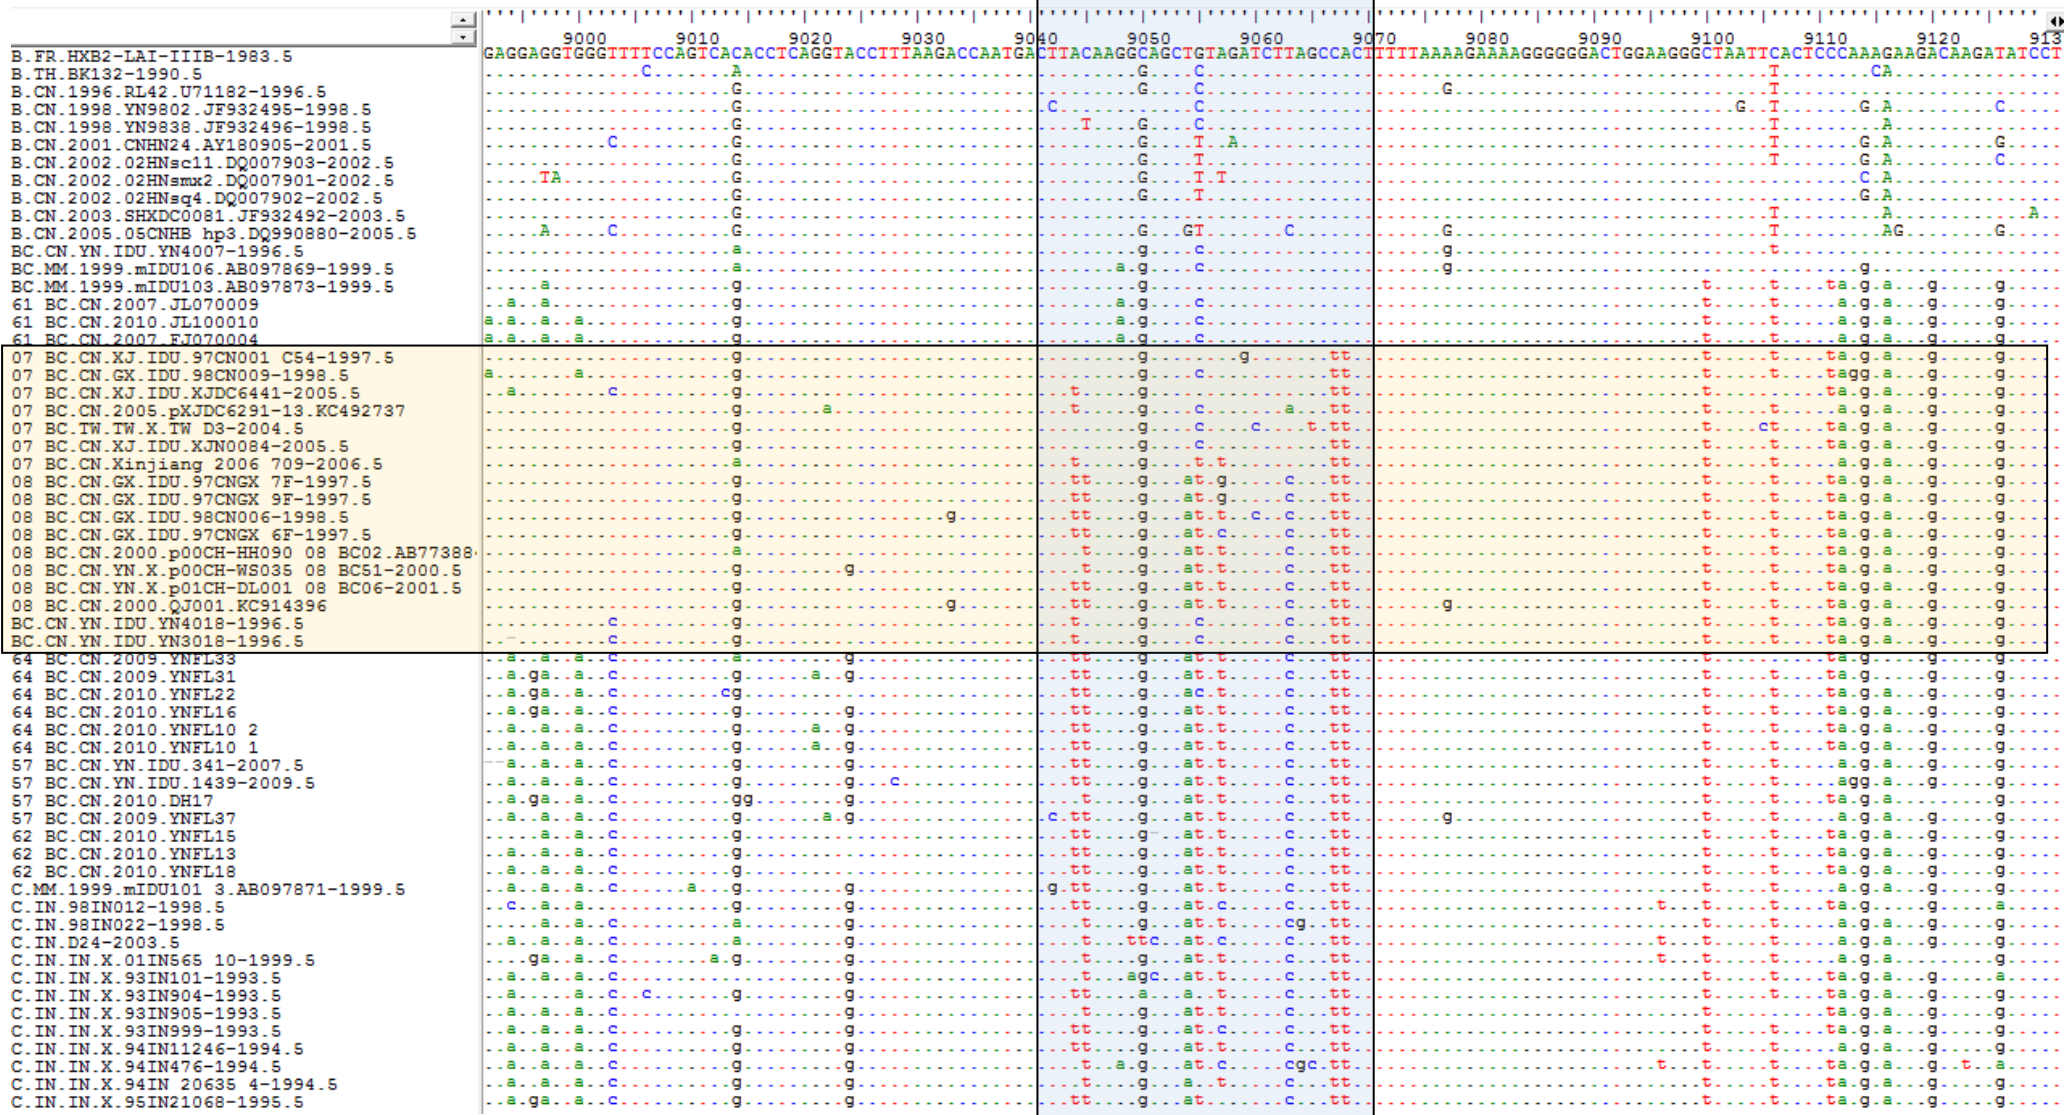

## Supplemental Figure S4

The updated subtype structures and breakpoints of recombinations of the CRFs\_BC

### CRF07\_BC

|      |      |   |
|------|------|---|
| 1    | 789  | N |
| 790  | 1214 | C |
| 1215 | 1377 | B |
| 1378 | 1593 | C |
| 1593 | 1641 | B |
| 1642 | 2009 | C |
| 2010 | 2546 | B |
| 2547 | 2980 | C |
| 2981 | 3180 | B |
| 3181 | 5693 | C |
| 5694 | 5790 | B |
| 5791 | 5850 | C |
| 5851 | 5998 | B |
| 5999 | 6044 | C |
| 6045 | 6430 | B |
| 6431 | 8872 | C |
| 8873 | 9059 | B |
| 9059 | 9569 | C |
| 9570 | 9686 | N |

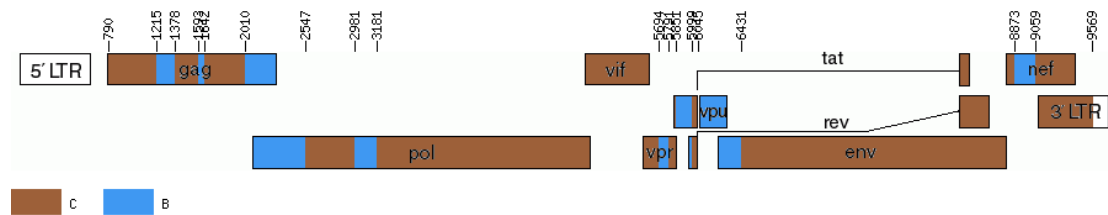

### CRF08\_BC

|      |      |   |
|------|------|---|
| 1    | 789  | N |
| 790  | 1214 | C |
| 1215 | 1298 | B |
| 1299 | 1423 | C |
| 1424 | 1641 | B |
| 1642 | 2854 | C |
| 2855 | 3180 | B |

|      |      |   |
|------|------|---|
| 3181 | 8872 | C |
| 8873 | 9059 | B |
| 9059 | 9569 | C |
| 9570 | 9686 | N |

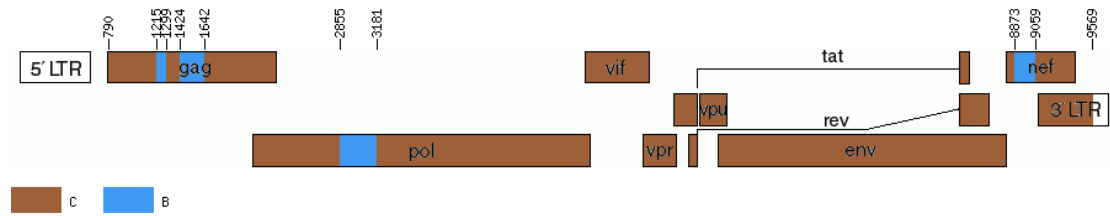

### CRF57\_BC

|      |      |   |
|------|------|---|
| 1    | 789  | N |
| 790  | 1214 | C |
| 1215 | 1838 | B |
| 1839 | 2504 | C |
| 2505 | 2581 | B |
| 2582 | 4387 | C |
| 4388 | 4498 | B |
| 4499 | 5693 | C |
| 5694 | 5774 | B |
| 5775 | 6379 | C |
| 6380 | 6423 | B |
| 6424 | 9600 | C |
| 9601 | 9686 | N |

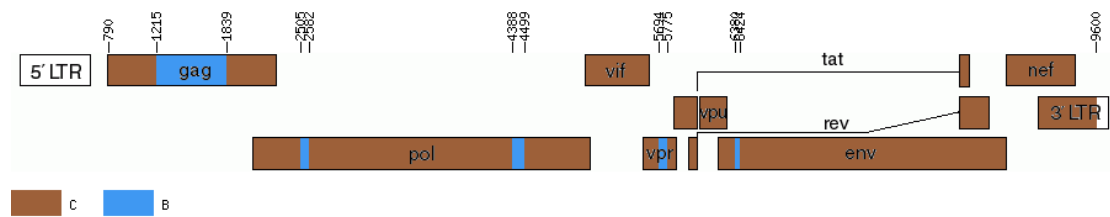

### CRF61\_BC

|      |      |   |
|------|------|---|
| 1    | 789  | N |
| 790  | 1213 | C |
| 1214 | 1277 | B |
| 1278 | 2504 | C |
| 2505 | 2579 | B |

|      |      |   |
|------|------|---|
| 2580 | 2780 | C |
| 2781 | 3181 | B |
| 3182 | 8779 | C |
| 8780 | 9078 | B |
| 9079 | 9412 | C |
| 9413 | 9689 | N |

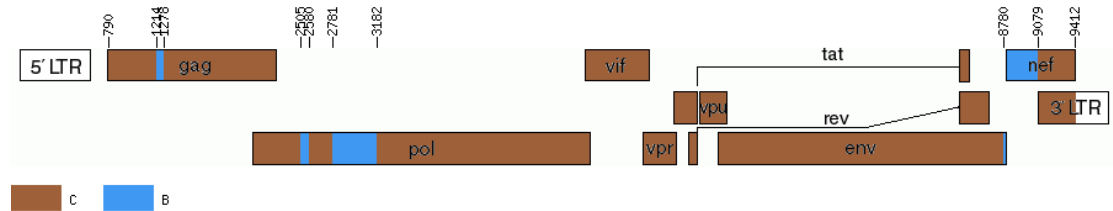

### CRF62\_BC

|      |      |   |
|------|------|---|
| 1    | 789  | N |
| 790  | 2622 | C |
| 2623 | 3219 | B |
| 3220 | 5693 | C |
| 5694 | 5790 | B |
| 5791 | 6042 | C |
| 6043 | 6418 | B |
| 6419 | 9598 | C |
| 9599 | 9686 | N |

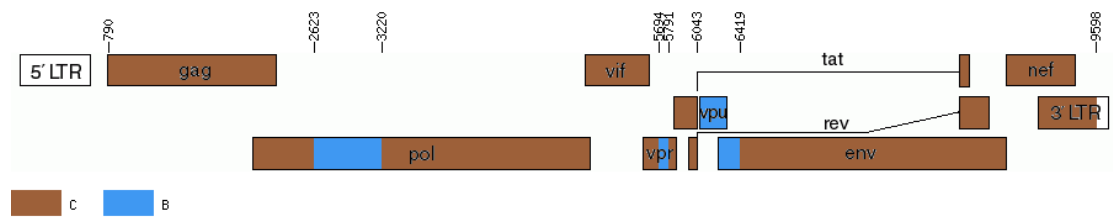

### CRF64\_BC

|      |      |   |
|------|------|---|
| 1    | 789  | N |
| 790  | 1191 | C |
| 1192 | 1331 | B |
| 1332 | 1599 | C |
| 1600 | 1641 | B |
| 1642 | 1917 | C |
| 1918 | 2277 | B |
| 2278 | 2455 | C |
| 2456 | 2584 | B |
| 2585 | 4633 | C |

|      |      |   |
|------|------|---|
| 4634 | 4919 | B |
| 4920 | 8679 | C |
| 8680 | 8752 | B |
| 8753 | 8872 | C |
| 8873 | 9009 | B |
| 9009 | 9602 | C |
| 9603 | 9686 | N |

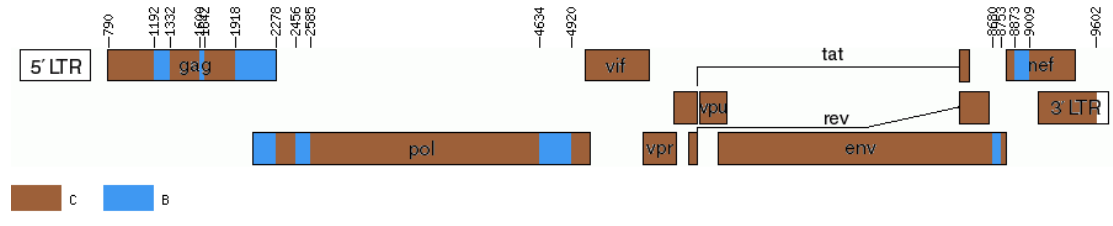

Supplement: srep19279-s1.pdf [file srep19279-s1.pdf]
